# Supplementary figures and images for: Roles for hENT1 and dCK in gemcitabine sensitivity and malignancy of meningioma
Source: PubMed Central journal article supplement — Neuro Oncol. 2021 Feb 8;23(6):945–54. doi: 10.1093/neuonc/noab015 (PMC8168817; doi:10.1093/neuonc/noab015), 2021-02-08

## HKBMM

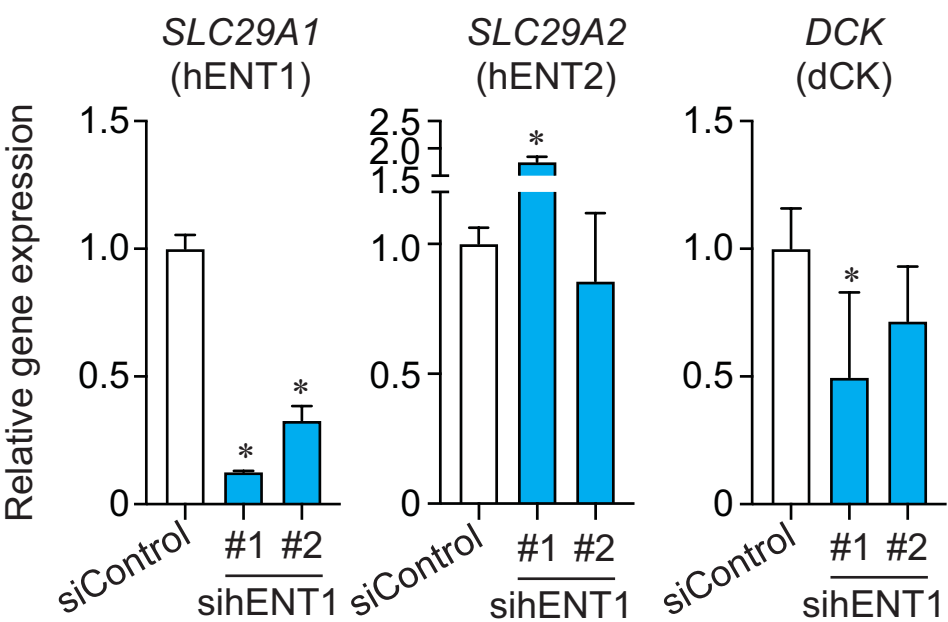

## IOMM-Lee

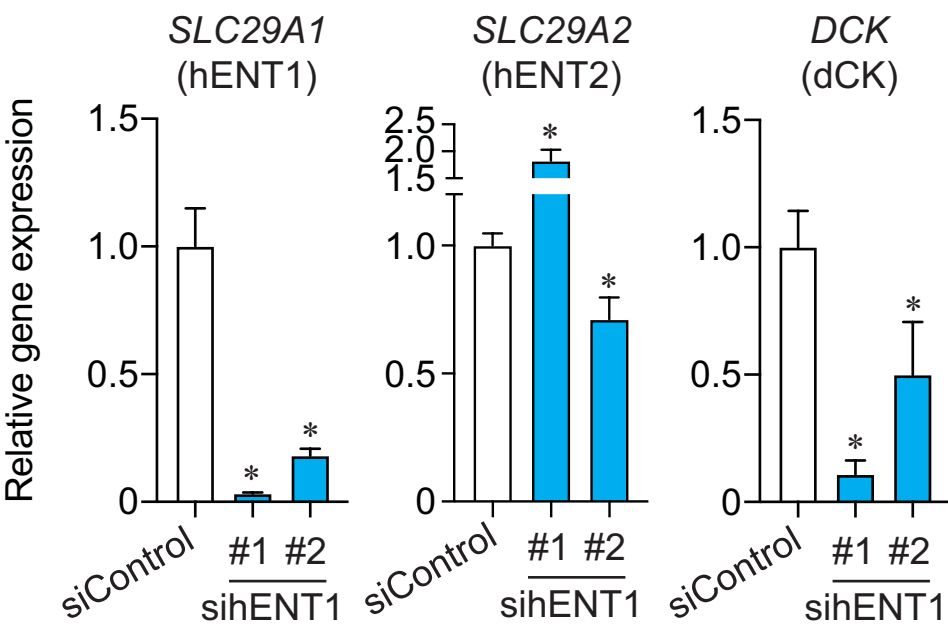

**Figure S4**

Supplement: noab015_suppl_supplementary_figure_s4.pdf [file noab015_suppl_supplementary_figure_s4.pdf]

**A**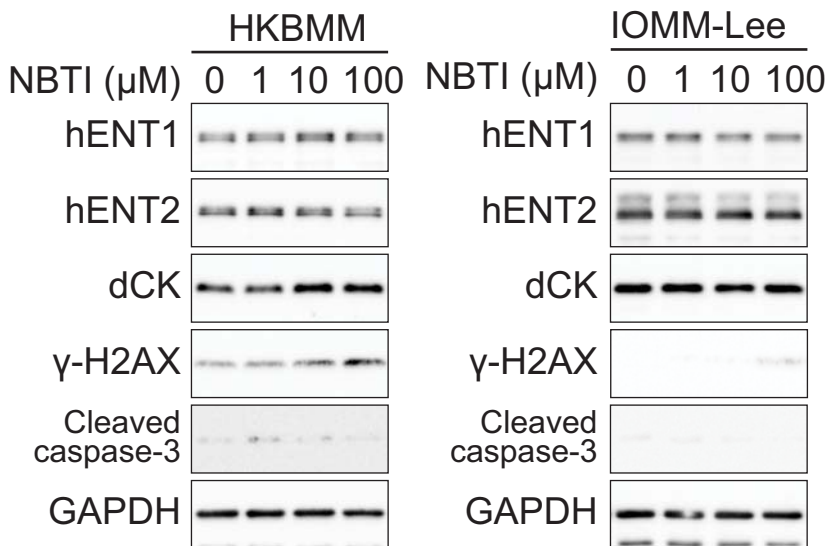**B**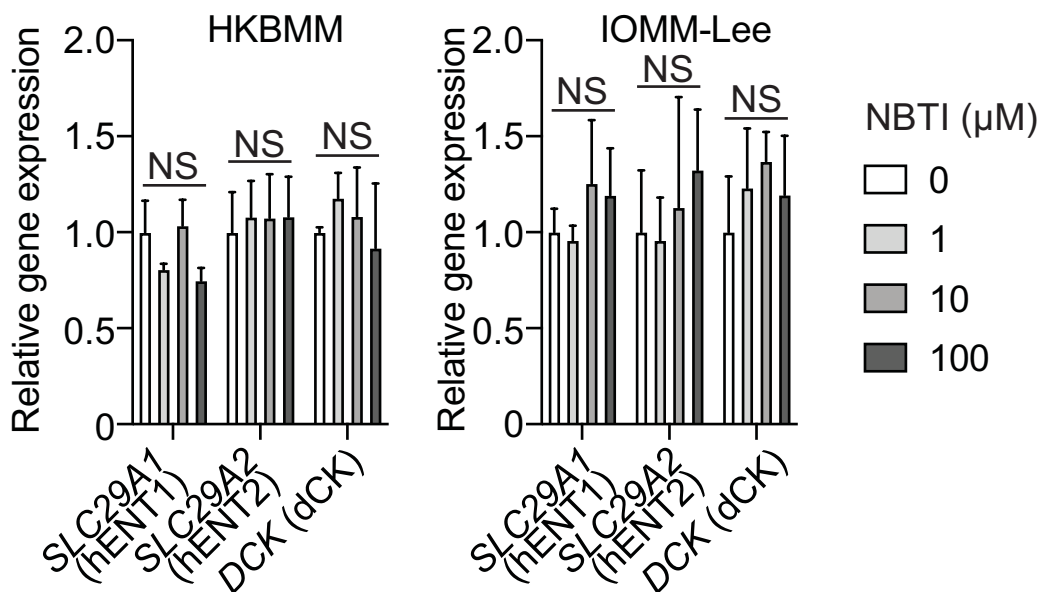**Figure S5**

Supplement: noab015_suppl_supplementary_figure_s5.pdf [file noab015_suppl_supplementary_figure_s5.pdf]

**A**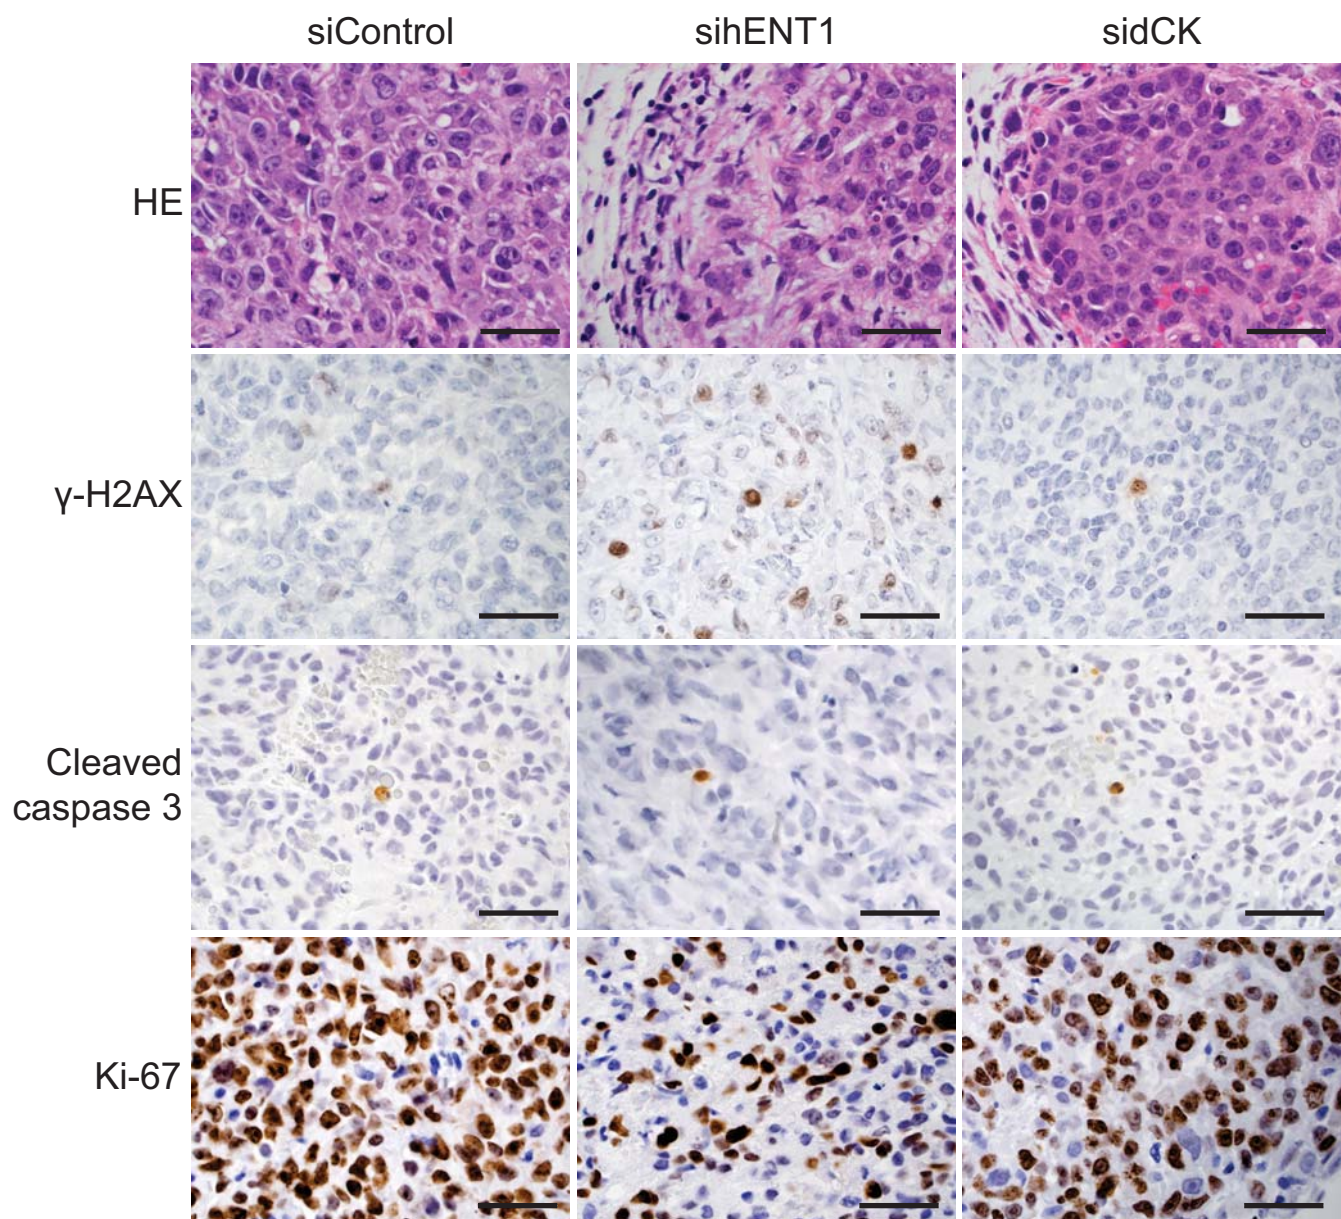**B**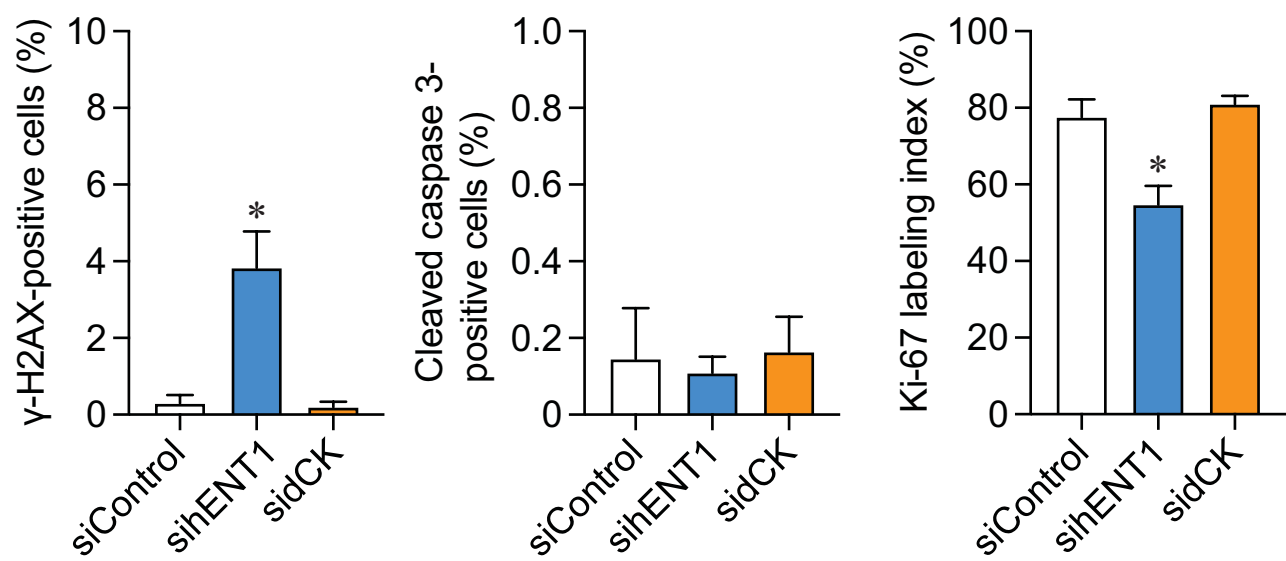**Figure S7**

Supplement: noab015_suppl_supplementary_figure_s7.pdf [file noab015_suppl_supplementary_figure_s7.pdf]
